# Supplementary material for: Interannual Variability of Dinophysis acuminata and Protoceratium reticulatum in a Chilean Fjord: Insights from the Realized Niche Analysis
Source: PubMed Central journal article supplement (PMC6356771; doi:10.3390/toxins11010019), 2019-01-05
Supplement: toxins-11-00019-s001.pdf [file toxins-11-00019-s001.pdf]

# Supplementary Materials: Interannual Variability of *Dinophysis acuminata* and *Protoceratium reticulatum* in a Chilean Fjord: Insights from the Realized Niche Analysis

Catharina Alves-de-Souza, José Luis Iriarte and Jorge I. Mardones

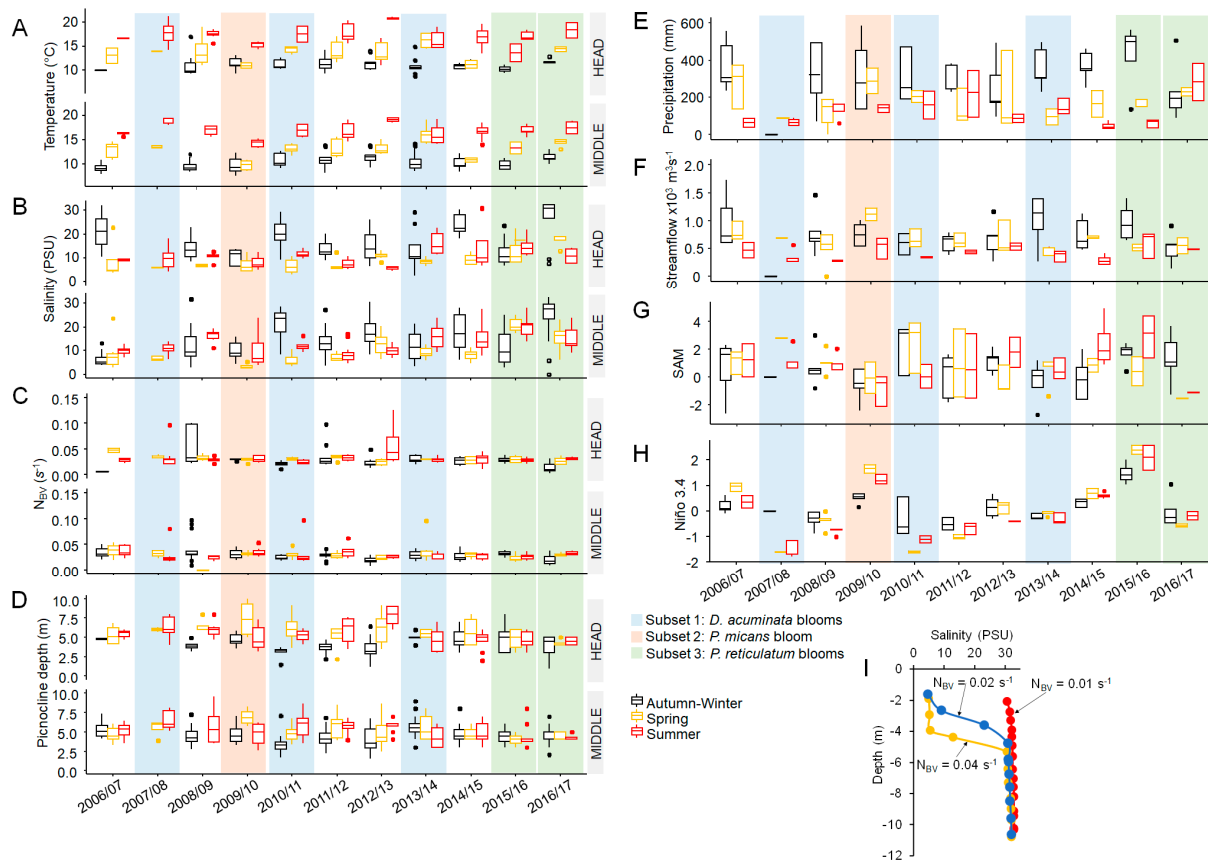

**Figure S1.** (A–H) Boxplots showing seasonal median values for the physical and meteorological variables in the different years. (I) Examples of salinity vertical profiles related to the different values of the Brunt-Väisälä buoyancy frequency.

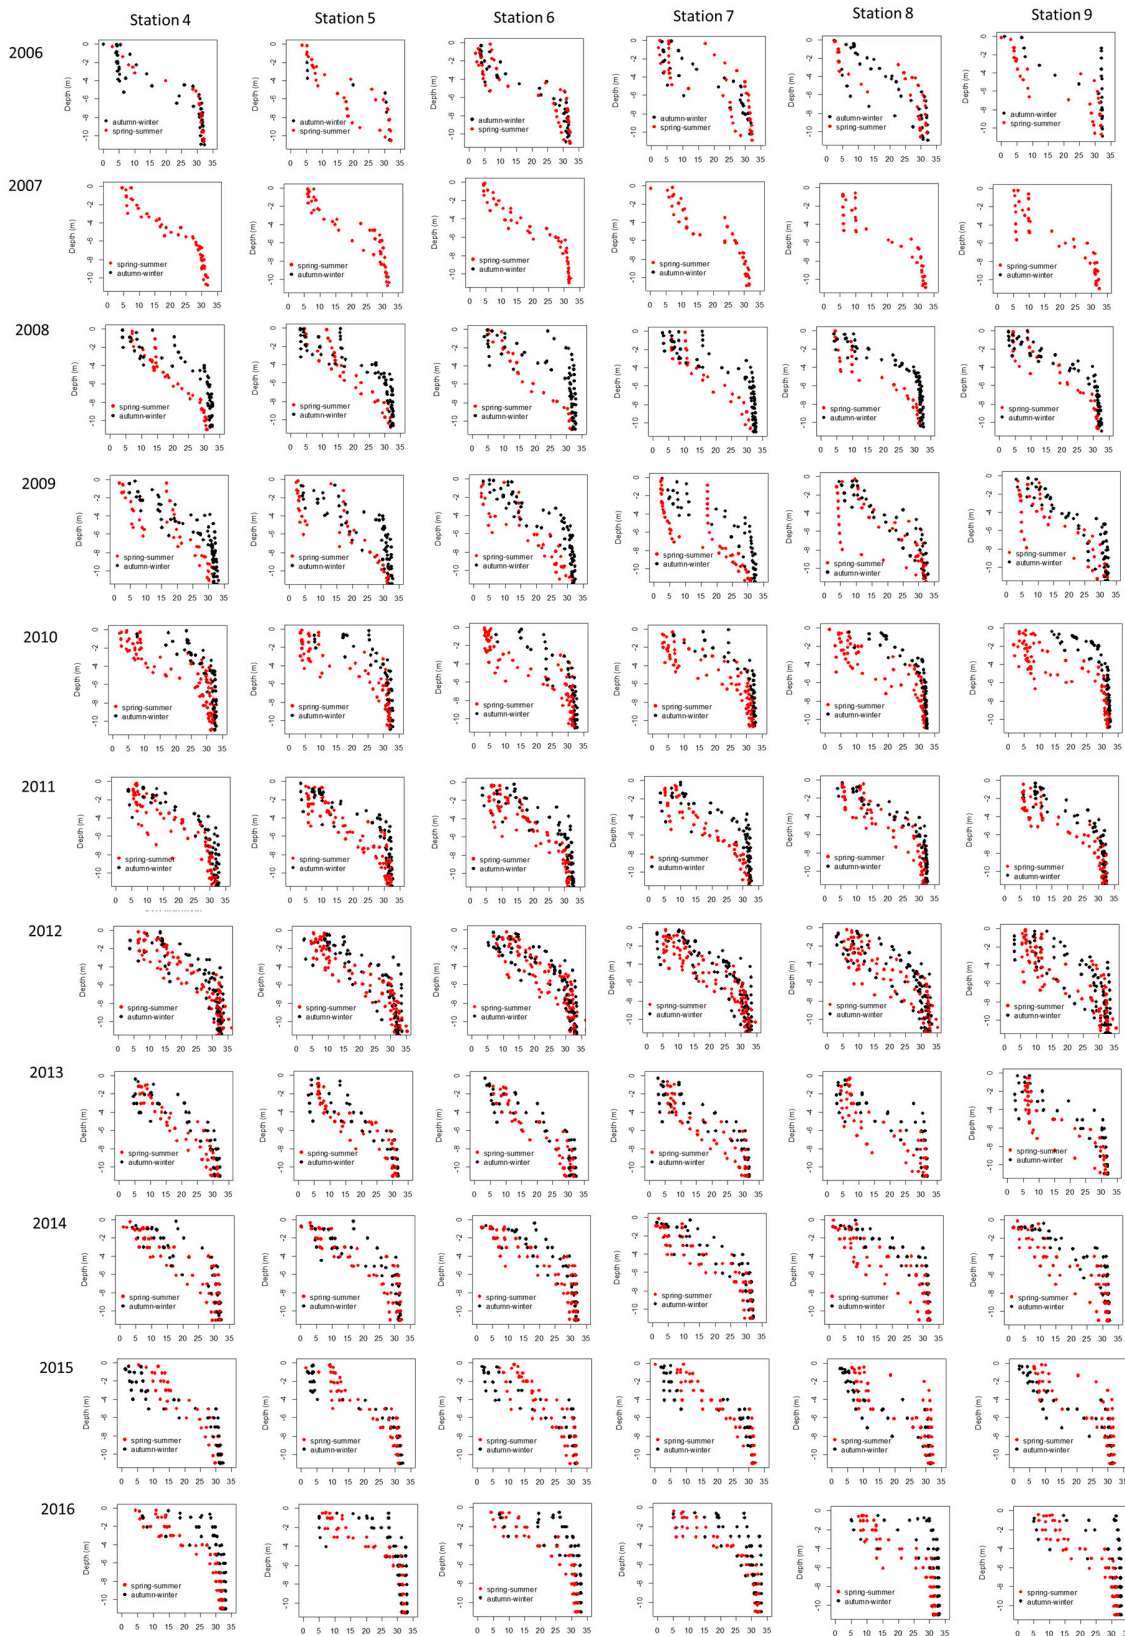

Figure S2. Salinity vertical profiles.

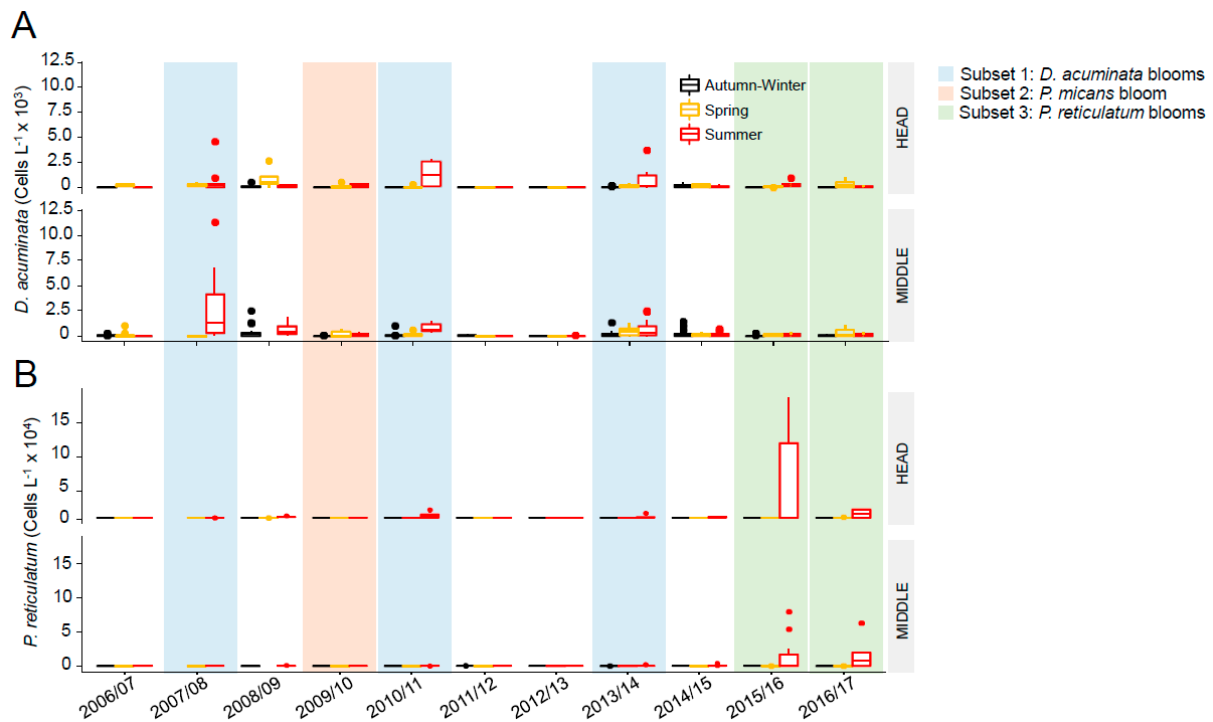

**Figure S3.** Box-plots showing seasonal median values for *Dinophysis acuminata* (A) and *Protoceratium reticulatum* (B) in the different years.

**Table S1.** Niche parameters estimated through the OMI analysis for the five *Dinophysis* species and *Protoceratium reticulatum* in the Reloncaví fjord during the 10-years time series. Niche parameters are given both as absolute values and percentages of variability of each species. Inertia = total variability, OMI = outlying mean index (i.e., marginality), Tol = Tolerance, Rtol = Residual Tolerance, OMI% = percentage of variability given by OMI, Tol% = percentage of variability given by Tol, Rtol% = percentage of variability given by Rtol. *P*-values are given by the nu number of random permutations (out of 10,000) that yielded a higher value than the observed marginality (OMI). Species in bold were the ones significant (*p* < 0.05).

| Species               | Code  | Inertia | Absolute Values |      |      | Percentages of Variability |       |       | <i>p</i> -value |
|-----------------------|-------|---------|-----------------|------|------|----------------------------|-------|-------|-----------------|
|                       |       |         | OMI             | Tol  | Rtol | OMI%                       | Tol%  | Rtol% |                 |
| <i>D. acuminata</i>   | Dacum | 12.65   | 0.61            | 3.26 | 8.77 | 4.80                       | 25.80 | 69.40 | 0.009           |
| <i>D. acuta</i>       | Dacut | 7.36    | 6.06            | 0.32 | 0.98 | 82.30                      | 4.30  | 13.40 | 0.405           |
| <i>D. caudata</i>     | Dcau  | 20.11   | 18.80           | 0.01 | 1.29 | 93.50                      | 0.10  | 6.40  | 0.009           |
| <i>D. tripos</i>      | Dtrip | 18.66   | 5.84            | 3.63 | 9.19 | 31.30                      | 19.40 | 49.30 | 0.029           |
| <i>D. punctata</i>    | Dpunc | 9.65    | 0.80            | 2.10 | 6.74 | 8.40                       | 21.80 | 69.80 | 0.158           |
| <i>P. reticulatum</i> | Pret  | 15.21   | 5.75            | 1.07 | 8.38 | 37.80                      | 7.10  | 55.10 | 0.009           |

**Table S2.** Subniche parameters estimated through the WitOMI analysis of *Dinophysis acuminata* (Dacum) and *Protoceratium reticulatum* (Pret) in the Reloncaví fjord for the summer months during the 10-years time series. Subniche parameters are given both as absolute values and percentages of variability of each species. WitOMIG = distance between the species center of gravity in the subset and mean habitat conditions (G); TolG = Tolerance in the subset related do G, RtolG = residual tolerance in the subset related do G, OMIG% = percentage of variability given by WitOMIG, TolG% = percentage of variability given by TolG, RtolG% = percentage of variability given by RtolG, InertiaG = total variability for WitOMIG. WitOMIGk = distance between the species center of gravity in the subset and mean habitat conditions of the subset (Gk); TolGk = Tolerance in the subset related do Gk, RtolGk = residual tolerance in the subset related do Gk, WitOMIGk% = percentage of variability given by WitOMIGk, TolGk% = percentage of variability given by TolGk, RtolGk% = percentage of variability given by RtolGk, InertiaGk = total variability for WitOMIGk. All subniches were significative ( $p < 0.01$ ).

| Species                                                                              | InertiaG | Absolute Values |       |       | Percentages of Variability |       |        |
|--------------------------------------------------------------------------------------|----------|-----------------|-------|-------|----------------------------|-------|--------|
|                                                                                      |          | WitOMIG         | TolG  | RtolG | WitOMIG%                   | TolG% | RtolG% |
| Subset 1: Summer months of years of <i>D. acuminata</i> blooms (2008, 2011 and 2014) |          |                 |       |       |                            |       |        |
| Dacum1                                                                               | 11.79    | 1.747           | 0.420 | 9.621 | 14.8                       | 3.6   | 81.6   |
| Pret1                                                                                | 8.31     | 3.141           | 0.246 | 4.919 | 37.8                       | 3     | 59.2   |
| Subset 2: Summer months of the year of <i>P. micans</i> bloom (2009)                 |          |                 |       |       |                            |       |        |
| Dacum2                                                                               | 15.95    | 13.574          | 0.256 | 2.118 | 85.1                       | 1.6   | 13.3   |
| Pret2                                                                                | 12.96    | 12.347          | 0.001 | 0.614 | 95.3                       | 0     | 4.7    |
| Subset 3: Summer months of years of <i>P. reticulatum</i> blooms (2016 and 2017)     |          |                 |       |       |                            |       |        |
| Dacum3                                                                               | 10.39    | 6.405           | 2.235 | 1.749 | 61.7                       | 21.5  | 16.8   |
| Pret3                                                                                | 9.71     | 3.126           | 1.083 | 5.498 | 32.2                       | 11.2  | 56.6   |
| Subset 4: Summer months of years with no dinoflagellate blooms                       |          |                 |       |       |                            |       |        |
| Dacum4                                                                               | 12.19    | 10.543          | 0.174 | 1.474 | 86.5                       | 1.4   | 12.1   |
| Pret4                                                                                | 13.543   | 5.446           | 0.476 | 7.621 | 40.2                       | 3.5   | 56.3   |
| Subset 1: Summer months of years of <i>D. acuminata</i> blooms (2008, 2011 and 2014) |          |                 |       |       |                            |       |        |
| Dacum1                                                                               | 10.21    | 0.17            | 1.84  | 8.21  | 1.60                       | 18.00 | 80.40  |
| Pret1                                                                                | 7.23     | 2.07            | 0.23  | 4.93  | 28.60                      | 3.20  | 68.20  |
| Subset 2: Summer months of the year of <i>P. micans</i> bloom (2009)                 |          |                 |       |       |                            |       |        |
| Dacum2                                                                               | 5.08     | 2.71            | 1.26  | 1.12  | 53.30                      | 24.70 | 22.00  |
| Pret2                                                                                | 2.28     | 1.66            | 0.01  | 0.61  | 730                        | 0.40  | 26.60  |
| Subset 3: Summer months of years of <i>P. reticulatum</i> blooms (2016 and 2017)     |          |                 |       |       |                            |       |        |
| Dacum3                                                                               | 8.78     | 4.80            | 1.25  | 2.74  | 54.60                      | 14.20 | 31.20  |
| Pret3                                                                                | 9.25     | 2.67            | 0.21  | 6.37  | 28.80                      | 2.30  | 68.90  |
| Subset 4: Summer months of years with no dinoflagellate blooms                       |          |                 |       |       |                            |       |        |
| Dacum4                                                                               | 9.26     | 7.61            | 0.12  | 1.53  | 82.20                      | 1.30  | 16.50  |
| Pret4                                                                                | 13.66    | 5.56            | 0.86  | 7.24  | 40.70                      | 6.30  | 53.00  |
